# Supplementary figures and images for: Global analysis of protein phosphorylation in yeast
Source: Springer Nature journal article supplement (doi:10.1038/nature04187), 2005-11-30

# Substrate specificity

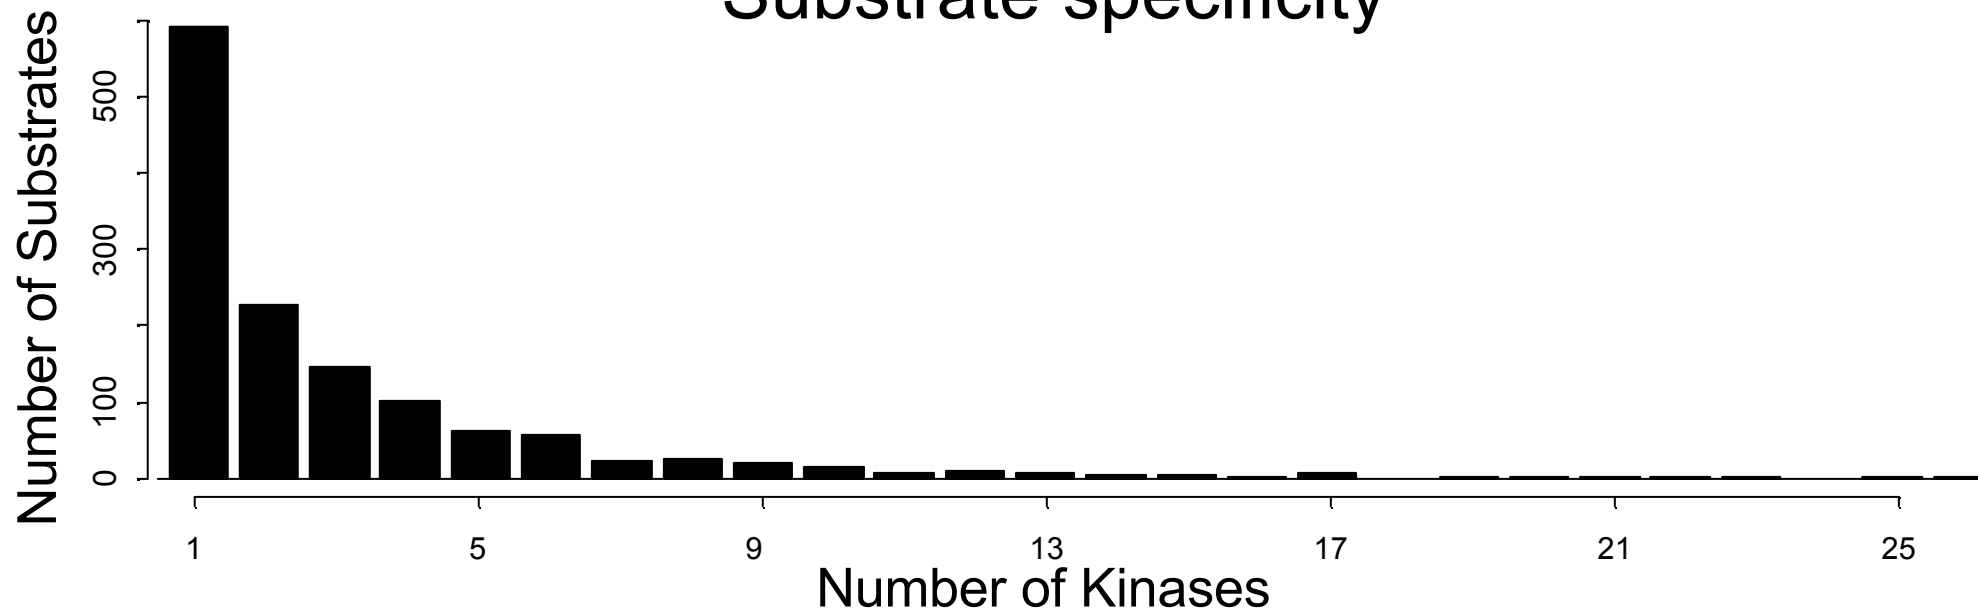

# Histogram of the substrate numbers

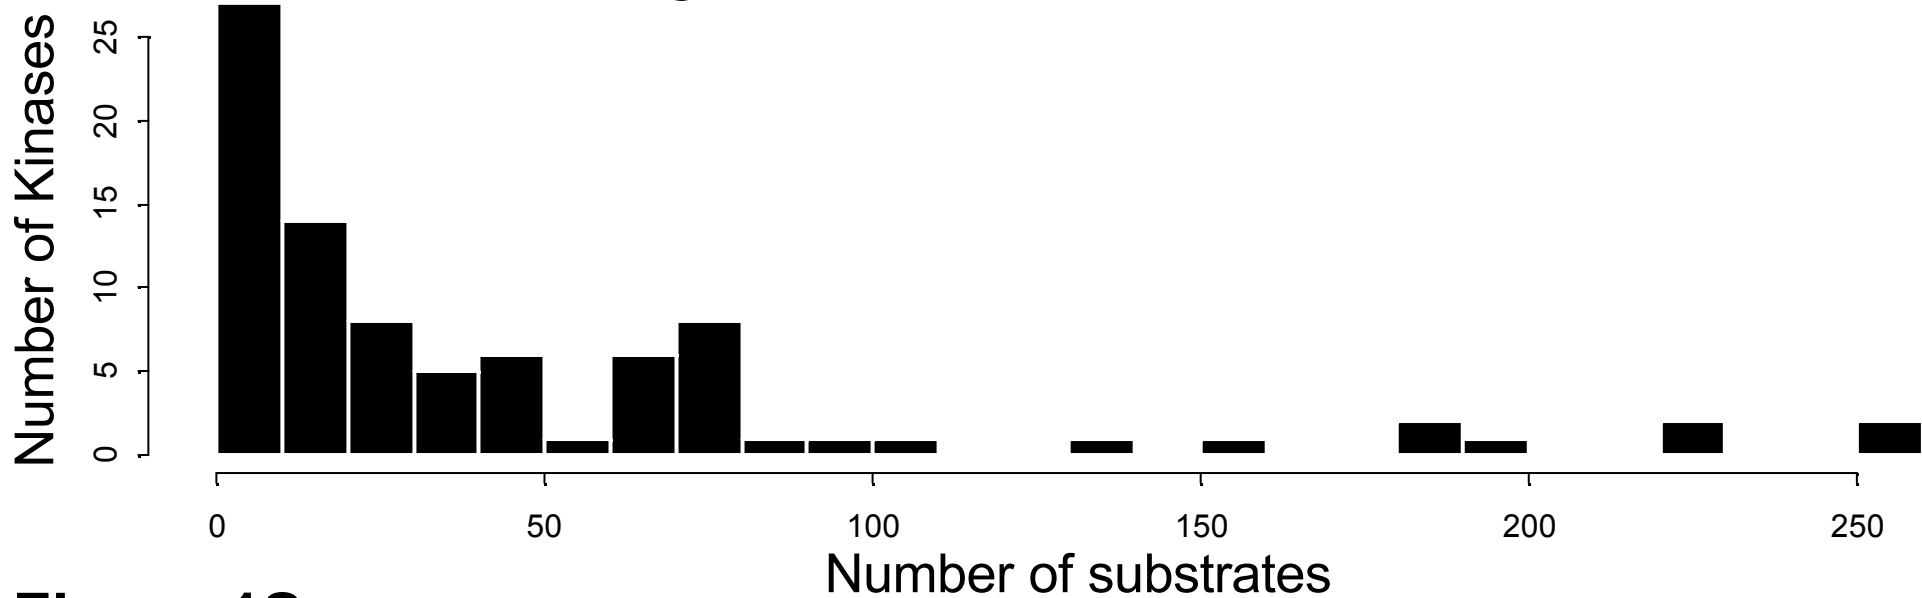

**Figure 1S.**

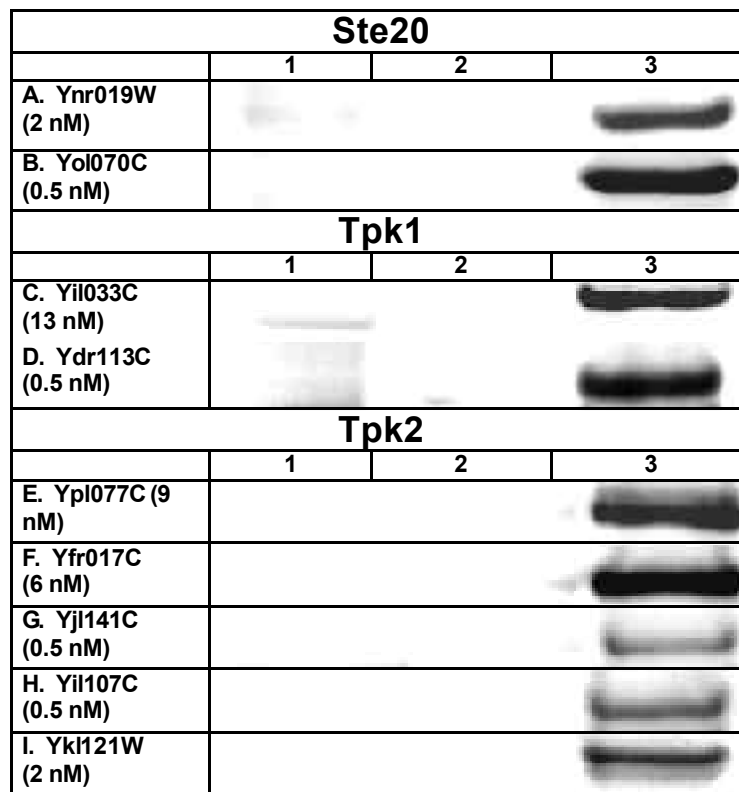

Figure 2S.

Supplement: nature04187-s2.pdf [file nature04187-s2.pdf]
